# Supplementary material for: Phytohormone biosynthesis and transcriptional analyses provide insight into the main growth stage of male and female cones Pinus koraiensis
Source: Front Plant Sci. 2023 Oct 11;14:1273409. doi: 10.3389/fpls.2023.1273409 (PMC10598626; doi:10.3389/fpls.2023.1273409)
Supplement: Supplementary file 2 [file Table_1.xlsx]

## Sheet: Table S1
Table S1 The qRT-PCR amplification system and procedure
System							Procedure
Addition				Volume (uL)			Reaction temperature (℃)	Time (s)	Cycle index
2 × SYBR (TB)				5			95	30
ROX Reforence Dye Ⅱ				0.2			95	5	40
Upstream and downstream primers				0.8			61	35
cDNA				1			95	15
ddH2O				3			60	60
Total				10			95	15

## Sheet: Table S2
Table S2 Statistics of transcriptome sequence data and quality control in male cones
Sample	Raw Reads	Clean Reads	Clean Base(G)	Error Rate(%)	Q20(%)	Q30(%)	GC Content(%)	Mapped Reads	Reads Percentage
MS1-1	51767688	49890864	7.48	0.03	97.27	92.45	44.46	42500832	0.8519
MS1-2	61242984	57118252	8.57	0.03	97.44	92.95	44.44	48680258	0.8523
MS1-3	55871928	53640692	8.05	0.03	97.42	92.84	44.45	45637004	0.8508
MS2-1	60666810	57104796	8.57	0.03	97.5	93.11	44.7	48954202	0.8573
MS2-2	60255636	56751028	8.51	0.03	97.42	92.79	44.62	48515720	0.8549
MS2-3	54798350	52449758	7.87	0.03	97.48	92.94	44.85	44877648	0.8556
MS3-1	54239028	52016108	7.8	0.03	97.44	92.81	44.43	44627580	0.858
MS3-2	56459662	53337696	8	0.03	97.5	93	44.56	45891512	0.8604
MS3-3	47941564	45556164	6.83	0.03	97.69	93.53	44.75	38923182	0.8544
Average	5.5916e+07	5.30962e+07	7.96444	0.03	97.4622	92.9356	44.5844	45400882	0.8551

## Sheet: Table S3
Table S3 The annotation information of unigenes for male cones
Database	Number of Genes	Percentage (%)
KEGG	85730	45.12
NR	119751	63.03
SwissProt	86701	45.63
Trembl	120108	63.21
KOG	64363	33.87
GO	102992	54.21
Pfam	91250	48.03
Annotated in at least one Database	120831	63.59
Total Unigenes	190002	100

## Sheet: Table S4
Table S4 Statistics of transcriptome sequence data and quality control in female cones
Sample	Raw Reads	Clean Reads	Clean Base(G)	Error Rate(%)	Q20(%)	Q30(%)	GC Content(%)	Mapped Reads	Reads Percentage
FS1-1	49980076	46902758	7.04	0.03	97.48	92.96	44.38	40092156	0.8548
FS1-2	50746980	48330932	7.25	0.03	97.56	93.17	44.61	41171478	0.8519
FS1-3	56597892	53682296	8.05	0.03	97.44	92.86	44.35	45836788	0.8539
FS2-1	67855910	63954618	9.59	0.03	97.48	92.95	44.65	54739040	0.8559
FS2-2	54680214	52238494	7.84	0.03	97.48	92.92	44.62	44752394	0.8567
FS2-3	56365240	53505110	8.03	0.03	97.53	93.1	44.76	45348604	0.8476
FS3-1	58509880	56436444	8.47	0.03	97.59	93.24	44.65	47841470	0.8477
FS3-2	59679690	56669484	8.5	0.03	97.45	92.84	44.66	48144332	0.8496
FS3-3	44304152	42143814	6.32	0.03	97.08	92.27	44.81	35942978	0.8529
Average	5.54133e+07	52651550	7.89889	0.03	97.4544	92.9233	44.61	44874360	0.8523

## Sheet: Table S5
Table S5 The annotation information of unigenes for female cones
Database	Number of Genes	Percentage (%)
KEGG	86416	44.32
NR	121256	62.19
SwissProt	86710	44.47
Trembl	121654	62.39
KOG	63232	32.43
GO	104207	53.45
Pfam	91627	46.99
Annotated in at least one Database	122293	67.72
Total Unigenes	194977	100

## Sheet: Table S6
Table S6 The annotation results of plant hormone signal transduction signaling pathway in male cones
	ID	MS1-1_fpkm	MS1-2_fpkm	MS1-3_fpkm	MS2-1_fpkm	MS2-2_fpkm	MS2-3_fpkm	MS3-1_fpkm	MS3-2_fpkm	MS3-3_fpkm
AUX/IAA	Cluster-3272.25523	2.23	1.91	2.87	4.98	7.45	6.48	3.29	3.53	2.49
	Cluster-3272.30939	3.86	8.54	12.14	12.04	9.69	9.68	0.72	1.04	2.2
	Cluster-3272.45658	7.34	17.21	12.35	14.09	13.85	11.65	1.29	2.9	1.65
	Cluster-3272.73654	14.27	12.98	8.8	3.39	4.94	1.3	23.27	33.01	30
	Cluster-3272.91204	10.77	12.22	10.9	11.75	11.69	19.44	1.83	1.47	3.76
	Cluster-3272.92384	64.08	64.34	31.97	35.13	43.18	40.51	8.36	11.45	15.27
ARF	Cluster-3272.103157	6.05	4.89	6.66	7.06	5.81	5.89	0.41	0.62	0.76
	Cluster-3272.106602	7.07	5.65	5.39	20.91	11.41	18.77	37.06	45.9	36.49
	Cluster-3272.106781	3.43	3.92	3.91	12.31	7.1	11.22	26.46	28.34	29.96
	Cluster-3272.117242	48.01	41.9	45.52	53.09	49.66	49.01	12.82	14.08	13.11
	Cluster-3272.63626	14.83	14.88	20.94	14.95	12.38	11.47	9.11	7.29	4.46
	Cluster-3272.68448	19.89	17.3	15.87	9.27	11.67	12.57	3.71	3.24	3.16
	Cluster-3272.71915	5.13	4.95	6.28	2.79	2.17	3.31	7.01	7.83	7.82
	Cluster-3272.73037	24.54	25.69	24.44	24.82	19.8	24.29	11.66	11.96	8.31
	Cluster-3272.74526	53.05	44.11	45.98	65.96	57.21	55.98	19.6	20.81	21.51
	Cluster-3272.74531	23.62	45.19	46.76	54.25	52.55	54.43	14.6	19.03	15.94
	Cluster-3272.88551	3.52	2.52	2.76	4.58	3.78	4.93	57.3	56.34	41.35
	Cluster-3272.88552	4.06	3.36	4.43	5.62	8.08	5.4	35.04	33.12	22.82
	Cluster-3272.88591	5.38	4.27	7.67	10.1	11.36	10.3	111.64	107.07	83.4
	Cluster-3272.89075	3.63	2.8	4.35	5.47	5.26	6.92	43.5	56.49	50.93
	Cluster-3272.93687	4.34	3.71	3.65	13.79	7.12	10.45	24.13	26.45	22.65
	Cluster-3272.93688	4.38	3.07	4.67	10.07	9.98	8.86	78.82	75.32	68.84
GH3	Cluster-3272.104306	13.23	9.99	20.35	13.99	16.55	14.37	36	40.03	34.13
	Cluster-3272.76440	2.91	3.58	4.29	0.9	1.41	3.89	13.19	12.96	12.72
SAUR	Cluster-3272.101411	3.91	3.39	10.27	7.25	4.21	5.63	15.12	14.79	13.1
	Cluster-3272.111493	10.39	11.67	7.29	2.6	6.77	4.11	1.18	1.22	1.45
	Cluster-3272.116012	4.61	4.69	6.7	4.53	3.51	1.68	7.34	8.58	8.46
	Cluster-3272.129475	2.04	1.77	2.89	7.77	18.47	10.89	0.15	0.2	0.44
	Cluster-3272.66243	2.66	1.53	2.72	10.93	14.14	9.59	9.1	11.06	7.25
	Cluster-3272.95483	11.63	10.07	9.74	7.19	5.12	7.7	13.75	12.93	12.05
	Cluster-3272.98021	14.09	22.23	9.21	8.81	8	8.34	32.89	28.42	20.55
AHP	Cluster-3272.81062	8.01	7.61	7.42	13.22	13.21	8.16	2.81	3.7	1.28
	Cluster-3272.87991	5.29	5.94	6.38	11.38	12.77	12.3	16.67	14.22	11.92
B -ARR	Cluster-3272.110961	2.39	1.86	2.92	2.99	2.67	3.35	21.06	15.5	13.16
	Cluster-3272.51601	8.95	8.41	9.46	8.24	6.59	6.6	2.83	2.94	3.64
	Cluster-3272.93358	2.98	2.15	2.42	4.17	3.41	5	26.41	23.6	12.6
	Cluster-3272.97990	1.4	2.06	1.46	1.35	1.22	0.89	3.86	6.9	4.03
	Cluster-3272.99807	3.89	4.6	4.25	4.87	5.33	4.57	0.81	1.07	0.27
A -ARR	Cluster-3272.110677	0.54	2.38	0.63	0.78	0.75	0.85	2.62	3.61	2.6
	Cluster-3272.132261	18.28	22.23	19.74	0.67	0.34	0.72	0.13	0.03	0.04
GID1	Cluster-3272.101326	2.44	2.24	1.88	0.27	2.4	0.4	26.46	22.09	31.88
	Cluster-3272.104464	3.1	4.44	2.62	2.13	1.88	3.18	6.4	4.77	6.45
	Cluster-3272.104994	0.14	0.16	2.29	0.35	0.55	0.13	14.29	28.58	34.04
	Cluster-3272.111772	0.39	0.49	0.55	2.33	4.85	4.24	6.32	6.72	6.37
	Cluster-3272.113792	15.01	11.68	8.95	6.14	6.86	8.24	18.98	22.65	24.46
	Cluster-3272.130188	4.45	6.68	6.02	6.18	3.16	3.37	0.09	0.43	0.15
	Cluster-3272.130189	6.49	4.98	11.73	10.2	8.62	6.88	1.04	1.06	1.47
	Cluster-3272.136800	10.23	6.42	34.17	9.5	14.08	13.26	0.74	1.74	0.42
	Cluster-3272.139177	6.08	4.23	12.41	10.87	9.07	6.63	0.8	1.45	1.4
	Cluster-3272.147731	8.95	6.27	23.83	13.83	10.29	7.3	0.26	0.25	0.58
	Cluster-3272.37053	8.69	5.44	21.31	6.24	8.19	5.65	1.52	1.49	1.18
	Cluster-3272.40284	1.44	2.35	2.69	0.22	0.9	0.37	18.69	18.51	19.24
	Cluster-3272.42025	8.84	5.9	18.33	11.3	9.42	7.38	0.49	0.28	0.22
	Cluster-3272.43778	27.28	27.47	21.88	25.41	20.05	19.74	0.74	0.51	2.34
	Cluster-3272.45009	164.18	541.92	871.36	1246.7	1607.29	1460.06	4.13	3.63	7.19
	Cluster-3272.52473	2.6	1.3	2.53	7.34	4.49	3.07	5.45	6.72	8.71
	Cluster-3272.53134	1.76	0.84	1.83	1.19	1.46	1.55	2.35	2.06	3.53
	Cluster-3272.60575	2.22	1.75	1.69	0.79	0.61	1.44	10.44	8.89	11.92
	Cluster-3272.66458	1.61	1.09	1.41	0.92	0.74	0.67	14.67	16.28	7.51
	Cluster-3272.69937	11.89	8.9	7.76	5.3	5.99	4.09	3.35	2.54	4.39
	Cluster-3272.75925	3.11	1.69	2.81	2.41	1.43	1.18	5.62	5.88	4.96
	Cluster-3272.76381	40.38	43.31	26.72	31.29	19.63	48.62	54.7	52.52	96.52
	Cluster-3272.76382	45.79	42.37	36.06	39.43	30.5	58.23	86.28	73.72	142.7
	Cluster-3272.83939	56.9	30.53	65.55	58.93	59.58	45.81	16.17	17.79	19.44
	Cluster-3272.89132	4.56	5.28	4.43	18.05	13.79	16.03	8.3	7.46	7.75
	Cluster-3272.90121	12.28	11.11	13.87	30.55	23.66	28.92	14.03	14.43	18.74
	Cluster-3272.97727	4.01	3.1	3.59	2.2	1.67	1.67	89.76	88.13	55.7
GID2	Cluster-3272.107947	14.15	10.83	4.99	7.13	7.85	7.48	15.55	9.18	17.74
	Cluster-3272.11450	2.27	1.44	0.45	3.4	8.68	5.48	1.99	1.04	6.06
	Cluster-3272.140272	29.43	27.06	16.79	16.49	13.04	15.97	0.32	0.31	0.19
	Cluster-3272.59237	8.18	7.78	3.51	3.18	4.36	5.14	0.79	1.56	1.45
	Cluster-3272.82317	2.77	1.75	5.85	1.88	2.61	1.03	4.45	3.38	6.03
DELLA	Cluster-3272.103427	3.74	3.77	3.74	4.33	3.44	4.88	1.44	0.83	1.14
	Cluster-3272.116526	15.88	14	16.35	11.54	11.37	10.07	5.29	5.5	7.88
	Cluster-3272.135134	8.23	9.17	8.36	1.95	2.03	2.54	1	1.06	0.83
	Cluster-3272.71815	18.04	28.53	15.88	16.39	15.75	15.85	77.41	70.93	75.69
	Cluster-3272.80188	4.93	5.49	9.11	3.88	5.18	4.71	9.74	13.74	11.68
	Cluster-3272.80190	34.13	27.82	29.83	20.85	21.12	23.1	10.72	12.04	14.64
	Cluster-3272.89152	4.52	4.51	2.61	7.41	15.31	7.96	33.82	12.29	27.62
	Cluster-3272.89581	6.2	7.17	7.29	2.98	3.03	3.74	4.43	5.3	3.96
	Cluster-3272.92820	21.31	19.77	24.5	17	16.01	16.03	32.78	31.56	37.45
	Cluster-3272.99652	3.23	3.83	3.35	2.26	2.9	2.23	7.1	4.69	5.15
	Cluster-3272.99679	2.37	1.15	2.55	0.9	1.55	1.68	3.72	3.19	2.4
TF	Cluster-3272.40962	14.15	12.07	10.81	0.91	1.28	2.14	0.73	0.76	0.09
	Cluster-3272.58554	9.71	7.11	5.54	5.04	4.59	4.16	12.99	13.08	13.46
	Cluster-3272.58556	19.18	17.38	12.61	4.86	4	3.39	12.1	12.24	12.85
PYR/PYL	Cluster-3272.105422	3.58	2.68	3.87	3.51	4.26	3.57	27.43	18.81	11.6
	Cluster-3272.113000	1.12	0.64	1.23	1.37	0.92	1.28	5.5	4.42	2.8
	Cluster-3272.54439	0.98	0.74	1.26	2.33	1.79	1.99	5.16	4.21	6.14
	Cluster-3272.95448	1.58	1.63	1.81	0.77	0.34	0.28	3.97	4.64	2.28
	Cluster-3272.97689	4.43	2.93	6.41	9.24	9.62	9.67	11.91	12	11.7
	Cluster-3272.99304	8.81	7.01	9.46	17.84	15.42	13.69	16.61	15.69	15.5
PP2C	Cluster-3272.100940	39.27	43.29	15.87	14.77	13.57	13.82	25.08	25.23	27.25
	Cluster-3272.115059	6.15	5.87	10.7	6.49	7.98	6.88	16.75	16.43	9.6
	Cluster-3272.121102	4.61	2.96	4.08	7.88	8.12	6.97	8.17	6.21	5.46
	Cluster-3272.59025	3.11	3.62	2.22	2.2	1.52	2	3.93	4.92	5.87
	Cluster-3272.65037	8.98	9.01	3.38	3.14	2.51	2.73	5.58	6.1	5.72
	Cluster-3272.78297	16.54	16.45	10.32	9.31	9.47	10.57	19.12	17.83	17.4
	Cluster-3272.82431	4.77	3.74	2.01	2.43	1.8	2.47	5.02	3.81	4.39
	Cluster-3272.84945	3.4	3.32	1.67	1.52	2.6	1.01	4.91	3.24	5.96
	Cluster-3272.86863	0.43	0.58	0.02	0.12	0.07	0.13	89.7	72.24	53.75
	Cluster-3272.94217	34.93	27.89	19.34	21.72	21.4	22.83	40.82	38.38	50.57
	Cluster-3272.95710	24.71	18.69	18.74	2.61	2.99	4.87	3.36	2.76	2.86
SnRK2	Cluster-3272.106783	1.6	1	1.42	1.25	1.69	1.54	6.32	4.75	6.23
	Cluster-3272.84215	5.23	4.4	5.62	5.33	4.21	5.03	17.76	16.23	17.25
ABF	Cluster-3272.103220	8.03	5.75	2.14	3.31	1.54	2.87	8.75	6.12	6.22
	Cluster-3272.76668	0.89	1.47	1.29	1.76	3.41	0.01	8.87	6.29	3.78
	Cluster-3272.76669	6.41	5.01	5.98	4.86	5.55	6.53	12.66	11.99	11.46
	Cluster-3272.92782	7.66	9.47	5.75	4.48	3.46	4.66	6.8	10.69	10.22
	Cluster-3272.99296	10.86	11.45	5.55	5.68	4	6.54	13.29	10.04	12.12
ETR	Cluster-3272.109449	3.2	3.02	5.93	3.8	3.71	4.61	9.16	7.42	8.76
	Cluster-3272.134789	6.63	7.14	6.67	11.55	14.33	11.36	0.1	0.14	0.49
	Cluster-3272.63413	1.29	0.92	1.71	2.96	1.6	1.97	4.84	4.58	3.87
CTR1	Cluster-3272.102776	27.27	27.45	29.66	10.01	7.32	11.94	8.32	9.79	16.18
	Cluster-3272.103843	34.34	30.08	27.65	18.92	14.9	15.37	9.59	11.16	13.74
	Cluster-3272.75187	7.49	6.1	6.11	14.19	11.81	14.05	11.41	9.04	8.27
	Cluster-3272.75188	15.54	12.35	12.97	11.48	10.47	10.77	30.31	30.34	24.74
	Cluster-3272.97685	18.5	19.01	19.81	10.09	9.86	8.19	8.71	8.76	10.04
	Cluster-3272.98691	4.46	6.19	4.63	1.78	2.12	2.15	1.46	1.9	1.76
SIMKK	Cluster-3272.77428	52.42	38.06	58.47	35.97	40.09	34.46	19.26	15.04	30.62
EBF1/2	Cluster-3272.106739	48.16	38.15	32.12	2.25	2.08	1.86	45.2	41.93	20.27
	Cluster-3272.113108	4.82	5.26	4.89	19.15	20.43	18.56	15.11	19.7	12.48
	Cluster-3272.69914	3.63	8.02	8.84	0.26	0.67	0.41	13.79	12.63	5.97
EIN3	Cluster-3272.106531	6	5	9.8	5.63	7.16	6.83	15.15	14.11	15.39
	Cluster-3272.80323	2.46	3.44	4.08	2.13	3.49	4.78	10.73	8.72	12.57
	Cluster-3272.97057	12.23	8.46	14.55	8.91	11.04	11.73	20.21	16.33	21.76
BSK	Cluster-3272.81963	18.93	13.57	17.2	19.24	14.77	16.63	5.29	6.48	8.63
	Cluster-3272.81966	16.69	18.67	20.71	12.75	12.99	11.4	37.93	43.12	43.57
	Cluster-3272.88233	43.54	38.74	35.15	18.05	17.27	16.14	38.96	50.33	45.79
BZR1/2	Cluster-3272.100676	5.24	8.03	4.33	5.02	4.84	4.58	0.68	1.84	2.13
	Cluster-3272.100722	70.38	106.89	62.09	46.5	39.04	55.76	23.01	19.73	26.82
	Cluster-3272.127973	13.47	22.83	8.07	17.05	14.76	21.3	3.21	4.8	5.18
	Cluster-3272.141261	12.32	19.73	16.99	8.02	7.16	6.73	0.83	1.1	0.92
	Cluster-3272.93619	105.82	141.86	84.48	79.32	75.29	79.86	32.62	29.07	35
TCH4	Cluster-3272.107817	0.83	0.24	7.38	1.61	2.31	2.06	116.43	77.04	62.47
	Cluster-3272.109218	0.57	0.68	6.05	1.17	1.46	1.28	70.07	47.04	37.5
	Cluster-3272.64900	0.42	1.3	2.76	1.5	0.84	0.83	27.97	17.14	16.14
	Cluster-3272.88151	10.79	41.12	62.66	128.81	102.39	73.91	110.35	37.37	17.39
CYCD3	Cluster-3272.125039	0.12	0.59	0.64	2.56	2.04	2.38	4.23	3.49	3.23
	Cluster-3272.51977	7.39	6.58	7.07	3.77	3.71	3.02	0.66	0.89	1
JAR1	Cluster-3272.93583	1.21	0.96	1.87	2.61	2.39	2.4	8.04	10.47	8.69
COI1	Cluster-3272.91895	1.16	0.84	1.7	2.39	3.54	3.39	0.74	1.21	2.04
	Cluster-3272.95093	0.42	0.6	1.03	0.89	1.73	1.26	23.15	23.38	21.89
JAZ	Cluster-3272.105985	5.7	6.42	6.85	4.95	2.8	7.75	1.25	0.54	2.89
	Cluster-3272.106872	3.34	3.79	2.98	4.19	4.08	4.37	0.87	1.15	1.53
	Cluster-3272.115137	12.23	26.26	14.17	12.64	14.37	28.74	7.23	4.25	7.5
	Cluster-3272.130828	11	39.34	0.51	5.29	0.34	34.42	1.61	0.93	2.18
	Cluster-3272.33532	6.21	7.51	7.21	8.07	8.06	9.46	2.26	2.28	3
	Cluster-3272.61675	5.53	3.58	3.17	8.63	8.09	7.2	1.51	1.61	1.96
	Cluster-3272.65210	3.93	6.15	1.87	4.61	4.68	14.71	58.34	61.24	37.34
	Cluster-3272.78364	3.97	2.53	2.98	6.26	4.19	5.88	1.78	1.61	1.87
	Cluster-3272.89246	6.99	6.84	8.04	11.72	8.59	13.55	0.9	0.54	0.49
	Cluster-3272.89252	39.7	38.04	46.18	63.27	47.15	82.61	86.76	76.01	76.54
	Cluster-3272.91541	11.76	12.2	12.54	13.9	13.45	15.18	54.93	38.58	29.54
MYC2	Cluster-3272.104199	2.38	8.94	10.07	4.29	10	9.89	0.51	0.49	2.91
	Cluster-3272.110159	17.79	17.5	19.12	2.01	0.09	1.84	0.22	0.91	1.45
	Cluster-3272.140439	4.89	1.76	5.35	4.57	3.72	2.84	1.87	1.27	0.99
	Cluster-3272.25839	9.96	9.96	10.85	9.65	8.92	7.24	0.63	0.23	0.18
	Cluster-3272.32495	12.84	14.65	11.07	11.78	9.41	8.14	0.21	0.3	0.36
	Cluster-3272.38458	18.44	13.54	18.18	18.17	15.89	16.39	3.37	3.6	5.24
	Cluster-3272.47719	8.5	5.32	4.48	6.03	5.27	6.14	0.72	1.07	0.39
	Cluster-3272.54837	1.99	3.73	6.24	4.44	4.57	5.42	1.57	2.61	2.11
	Cluster-3272.58559	38.66	36.12	28.32	2.05	1.6	3.73	0.21	0.19	0.7
	Cluster-3272.64050	38.54	56.22	58.45	55.47	48.98	39.33	12.16	11.41	10.41
	Cluster-3272.67668	2.86	15.27	18.42	11.66	16.51	17.39	0.34	0.86	0.46
	Cluster-3272.81438	15.52	18.86	19.51	20.71	17.45	30.34	42.7	32.56	48.76
	Cluster-3272.86718	9.6	9.08	8.99	7.07	6.23	5.57	10.66	12.44	11.94
	Cluster-3272.92441	36.56	36.18	31.76	21.46	18.55	26.37	9.36	11.15	13.39
TGA	Cluster-3272.120232	4.35	3.47	5.72	3.18	3.05	4.14	5.98	5.94	7.41
	Cluster-3272.129963	0.07	0.31	0.59	12.08	24.17	13.82	1.97	3.6	2.04
	Cluster-3272.26978	1.79	0.72	1.07	9.99	25.91	15.26	1.32	0.89	3.95
PR1	Cluster-3272.27075	23.95	21.92	22.34	18.24	17.3	10.82	0.54	1.71	2.56
	Cluster-3272.44447	18.98	21.63	8.69	6.29	12.19	5.72	0.4	0.38	1.14
	Cluster-3272.48661	15.51	14.51	21.26	11.69	12.12	10.89	1.19	1.95	9.92

## Sheet: Table S7
Table S7 The annotation results of plant hormone signal transduction signaling pathway in female cones
	ID	FS1-1_fpkm	FS1-2_fpkm	FS1-3_fpkm	FS2-1_fpkm	FS2-2_fpkm	FS2-3_fpkm	FS3-1_fpkm	FS3-2_fpkm	FS3-3_fpkm
AUX/IAA	Cluster-6422.105211	157.52	140.3	133.33	115.23	120.53	107.57	79.96	66.96	57.96
	Cluster-6422.121960	11.82	10.83	16.76	5.1	6.3	2.36	4.33	3.31	1.76
	Cluster-6422.124818	33.62	29.22	10.96	14.53	15.2	19.05	11.58	7.8	6.55
	Cluster-6422.127682	7.98	6.89	7.16	13.96	24.64	12.41	8	11.56	6.07
	Cluster-6422.130273	9.39	4.27	5.65	7.44	12.64	5.32	8.45	22.24	23.59
	Cluster-6422.40816	1.37	2.5	1.69	16.73	20.65	0.19	9.97	9.04	6.67
	Cluster-6422.58427	61.84	72.21	61.06	49.2	50.03	25.85	33.89	25.92	20.68
	Cluster-6422.63067	143.57	141.54	116.72	102.76	108.43	91.5	79.21	62.66	53.19
	Cluster-6422.67898	14.86	13.27	9.1	23.66	30.6	20.2	13.71	9.12	8.34
	Cluster-6422.72663	7.75	5.75	12.05	10.84	6.65	6.6	3.23	3.37	1.81
	Cluster-6422.90901	3.03	3.23	6.18	4.16	8.8	4.23	5.85	11.45	10.45
	Cluster-6422.94318	81.56	85.01	120.47	56.02	66.54	71.24	53.23	38.01	33.17
ARF	Cluster-6422.120603	31.72	27.84	22.65	24.15	26.32	2.71	12.83	9.57	7.88
	Cluster-6422.132154	9.56	9.14	10.75	5.76	5.21	4.42	4.59	3.15	2.58
	Cluster-6422.145041	5.08	3.92	5.8	3.6	3.45	2.14	1.47	1.51	1.42
	Cluster-6422.153879	1.78	2.27	4.35	3.13	3.65	2.79	2.12	0.8	0.92
	Cluster-6422.37727	3.36	0.86	2.24	2.33	4.26	3.68	1	1.59	0.71
	Cluster-6422.52967	8.84	7.54	14.48	6.89	7.88	6.28	2.73	1.62	2.81
	Cluster-6422.77582	1.07	1.35	1.48	1.64	1.24	0.83	0.31	0.53	0.28
	Cluster-6422.94121	10.47	5.94	6.47	8.2	10.75	13.05	4.09	6.45	3.11
	Cluster-6422.97653	77.9	76.07	147.2	55.31	61.97	41.56	53.55	43.76	42.04
GH3	Cluster-6422.100926	1.28	0.77	4.01	10.99	43.74	7.69	0.27	1.12	1.48
	Cluster-6422.31821	1.03	1.53	4.13	11.03	37.11	7.87	0.21	1.22	1.52
	Cluster-6422.73708	0.88	0.82	0.26	0.7	2.52	0.44	5.21	2.06	1.49
	Cluster-6422.83012	1.74	1.2	1.79	3.86	10.58	15.95	0.99	1.24	1.27
	Cluster-6422.84644	3.16	3.35	2.64	8.43	6.95	3.94	9.37	7.17	6.52
	Cluster-6422.91343	1.09	0.81	1.68	4.06	8.42	17.16	1.19	2.08	1.14
SAUR	Cluster-6422.101651	6.33	3.83	2.43	2.79	1.6	7.28	14.82	9.09	10.55
	Cluster-6422.118185	1.92	1.15	0.34	18.87	11.68	10.35	5.3	8.1	8.24
	Cluster-6422.141291	1.75	1.2	1.19	1.48	0.86	1.12	6.47	2.33	2.21
	Cluster-6422.142636	0.35	1.02	1.28	5.26	6.89	5.43	1.71	5.22	3.47
	Cluster-6422.19216	3.14	4.78	10.34	1.81	1.65	2.13	1.85	1.33	0.02
	Cluster-6422.41789	25.69	15.31	13.31	5.07	2.5	6	8.9	1.88	1.86
	Cluster-6422.48921	0.23	0.41	0.78	2.66	7.04	6.35	1.07	5.59	3.44
	Cluster-6422.52161	1.22	1.57	1.47	4.28	3.45	1.56	2.34	3.51	3.91
	Cluster-6422.60680	0.37	1.09	0.41	1.21	2.26	4.96	0.71	8.21	3.91
	Cluster-6422.60681	1.86	2.43	1.2	4	4.05	2.24	2.15	10.01	6.86
	Cluster-6422.64566	3.76	3.2	3.54	16.47	7.16	9.71	18.78	6.51	9.75
	Cluster-6422.83111	3.69	3.4	1.87	11.51	10.81	4.33	5.38	19.51	15.88
	Cluster-6422.86471	3.84	4.1	0.54	32.23	15.93	5.28	12.03	12.92	11.34
AHP	Cluster-6422.32602	65.72	66.13	21.78	15.29	21.74	16.79	3.51	4.93	2.64
B -ARR	Cluster-6422.131301	5.34	6.89	6.58	1.26	1.72	3.28	1.12	1.8	0.9
	Cluster-6422.43495	1.75	0.74	0.75	1.7	2.62	2.58	2.79	4.07	3.71
	Cluster-6422.46107	3.21	4.16	6.7	1.12	1.3	1.63	2.39	1.66	1.59
	Cluster-6422.59312	3.78	4.07	4.25	3.35	2.22	3.98	7.03	7.67	7.45
	Cluster-6422.95031	19.16	21.41	23.6	4.79	5.49	11.71	3.23	3.24	3.98
A -ARR	Cluster-6422.116343	1.6	1.86	6.57	0.95	0.66	0.08	0.94	1.04	1.04
	Cluster-6422.76115	10.79	10.95	27.98	3.92	4.04	4.44	3.77	3.88	3.41
GID1	Cluster-6422.102170	10.76	14.94	4.94	141.68	93.73	74.37	37.72	32.78	37.51
	Cluster-6422.103654	8.74	8.47	2.73	19.2	12.27	42.51	48.58	42.96	51.4
	Cluster-6422.105231	10.48	11.77	3.18	48.79	41.1	85.37	31.01	48.33	49.46
	Cluster-6422.105323	5.13	2.79	5.55	1.11	1.63	17.07	2.36	1.76	1.12
	Cluster-6422.113698	4.11	6.56	8.77	5.45	4.6	12.73	23.57	16.88	14.11
	Cluster-6422.116364	13.42	11.02	17.33	5.91	5.88	4.2	5.4	5.35	5.29
	Cluster-6422.118391	1.95	2.61	5.13	6.78	3.05	24.07	17.31	29.82	25.24
	Cluster-6422.132414	0.65	0.86	0.76	2.36	1.98	4.06	9.11	4.73	4.75
	Cluster-6422.135293	2.08	3.31	0.5	22.49	18.21	30.73	12.96	22.26	27.56
	Cluster-6422.149344	4.68	8.82	2.75	3.99	3.65	3	0.78	0.56	0.49
	Cluster-6422.152389	11.04	8.45	8.85	11.49	8.74	9.19	3.08	1.86	2.98
	Cluster-6422.28433	5.89	4.14	1.6	2.74	2.29	1.13	0.96	1.06	0.47
	Cluster-6422.45219	7.18	9.21	9.51	4.85	4.48	3.5	3.93	4.22	3.23
	Cluster-6422.56286	2.02	2.18	1.97	3.9	2.04	7.02	5.14	5.44	5.78
	Cluster-6422.64916	1.29	1.43	1.77	23.1	10.21	16.4	6.8	11.38	19.85
	Cluster-6422.64969	0.24	0.62	0.07	10.07	10.58	12.86	8.82	15.38	16.25
	Cluster-6422.65920	3.2	2.21	2.08	7.64	6.01	7.39	7.45	12.3	15.18
	Cluster-6422.73156	2.44	3	4.48	4.01	2.92	12.91	12.02	20.45	14.64
	Cluster-6422.76398	2.67	3.51	1.58	22.92	14.45	24.21	8.83	17.19	20.5
	Cluster-6422.77169	2.77	5.15	1.47	7.85	6.2	27.74	2.66	3.64	4.92
	Cluster-6422.80026	12.96	11.37	23.32	11.47	12.29	14.16	6.91	5.82	6.56
	Cluster-6422.81272	1.06	0.91	0.23	7.44	4.05	4.78	10.26	11.61	15.34
	Cluster-6422.85878	29.06	29.35	31.25	57.68	39.18	56.25	89.88	78.54	89.96
	Cluster-6422.87738	3.63	2.57	0.88	7	5.63	6.18	21.91	18.06	30.13
	Cluster-6422.88387	230.68	223.4	183.71	300.97	243.37	536.86	467.33	471.35	484.95
	Cluster-6422.93676	15.11	17.31	6.12	105.34	80.57	133.66	63.81	108.25	105.3
	Cluster-6422.95804	2.57	3.17	2.94	6.56	5.48	6.85	10.42	8.75	9.28
	Cluster-6422.98937	0.83	0.27	0.24	3.9	1.26	7.23	21.55	17.19	21.46
	Cluster-6422.98938	22.66	29.22	5.24	33.64	28.56	68.58	87.88	82.11	88.92
GID2	Cluster-6422.101056	1.23	1.92	1.4	2.46	4.55	3.37	2.56	5.31	4.98
	Cluster-6422.116960	19.19	20.78	21.51	4.38	3.32	9.81	12.33	3.25	4.03
	Cluster-6422.134213	0.85	0.87	0.53	8.54	8.13	2.58	2.79	3.3	4.23
	Cluster-6422.158179	6.9	7.96	4.79	11.63	20.35	14.63	5.91	18.46	16.44
	Cluster-6422.20268	16.33	18.4	50.69	7.21	4.82	5.69	11.62	6.23	6.48
	Cluster-6422.55004	8.8	12.19	6.91	16.38	27.68	19.84	10.46	19.98	19.41
	Cluster-6422.55005	0.09	0.17	0.08	7.1	7.74	1.75	2.33	7.96	7.57
	Cluster-6422.55006	2.92	3.89	1.73	4.22	2.01	17.93	18.61	4.39	9.2
DELLA	Cluster-6422.103795	9.72	9.21	8.1	5.99	4.91	1.9	1.22	0.39	0.46
	Cluster-6422.108195	26.77	22.57	32.52	15.47	15.95	15.72	12.47	11	8.18
	Cluster-6422.31509	3.91	3.89	6.05	3.41	3.52	2.14	2.6	1.06	1.3
	Cluster-6422.66247	11.28	11.45	6.58	23.32	15.47	20.63	12.43	16.73	15.51
	Cluster-6422.68554	6.47	4.59	2.78	10.59	7.65	11.44	17.33	10.26	13.12
	Cluster-6422.75524	3.75	3.02	3.32	1.19	1.42	2.81	1.93	1.63	0.69
	Cluster-6422.79472	16.96	17.11	26.41	29.46	29.85	64.98	36.96	38.73	30.97
	Cluster-6422.79786	20.65	20.42	20.68	13.57	10.92	11.32	8.1	4.99	4.87
	Cluster-6422.81141	20.59	22.45	26.31	69.3	107.36	50.91	35.52	83.14	64.25
	Cluster-6422.85335	9.4	12.13	7.52	59.25	46.89	32.1	30.21	33.97	34.32
	Cluster-6422.87011	2.13	1.81	0.84	2.43	1.47	4.26	8.09	5.51	6.46
	Cluster-6422.89229	23.05	22.67	27.92	20.49	16.08	17.8	14.16	8.91	10.48
	Cluster-6422.89289	10.71	14.19	14.34	43.77	53.45	32.61	20.19	47.33	35.38
	Cluster-6422.89290	20.59	22.63	25.5	59.3	95.08	43.69	36.22	95.6	79.93
	Cluster-6422.90805	6.2	6.61	11.3	4.63	4.61	3.33	3.96	3.16	2.53
	Cluster-6422.99703	2.35	2.39	3.23	2.55	2.45	2.99	6.6	6.93	6.49
	Cluster-6422.99816	67.73	78.75	111.53	51.8	47.76	42.94	45	35.34	33.04
PYR/PYL	Cluster-6422.129857	2.71	3.8	1.88	7.51	11.24	1.08	0.49	1.28	1.37
	Cluster-6422.138139	13.12	17.25	11.58	8.25	6.37	3.55	3.38	3.09	2.99
PP2C	Cluster-6422.125026	7.32	6.83	6.69	12.16	12.04	21.09	10.6	12.46	11.48
	Cluster-6422.63944	7.19	10.53	11.87	11.51	15.87	0.96	26.37	44.95	36.12
	Cluster-6422.65910	1.29	0.85	10.26	1.82	1.56	24.93	14.73	24.23	29.08
	Cluster-6422.80402	10.13	10.11	7.55	17.4	20.93	22.37	9.62	15.65	13.54
	Cluster-6422.80403	2.55	1.9	1.43	6.12	5.88	3.31	1.86	5.15	4.18
	Cluster-6422.80405	1.74	1.54	1.02	2.43	3.03	5.26	1.32	3.23	1.28
	Cluster-6422.80407	1.4	1.26	1.31	2.47	1.89	4.07	1.29	1.76	1.64
	Cluster-6422.95007	4.41	5.05	5.72	8.86	7.13	17.6	4.93	4.02	4.84
SnRK2	Cluster-6422.23179	1.91	3.07	1.63	3.12	1.05	1.24	0.99	0.38	0.36
	Cluster-6422.96527	4.64	5.1	8.06	3.82	2.02	6.28	3.17	2.13	2.1
ABF	Cluster-6422.90729	29.53	32.55	39.15	17.53	20.02	14.92	21.2	14.33	11.93
ETR	Cluster-6422.85341	2.66	2.83	6.81	2.32	1.96	1.8	6.78	6.37	5.96
CTR1	Cluster-6422.56116	1.83	0.79	2.2	4.04	4.25	2.05	4.24	5.44	3.14
	Cluster-6422.74860	3.23	4.21	4.51	6.85	5.37	5.48	9.28	8.38	9.18
	Cluster-6422.75436	1.12	1.71	1.51	4.15	4.78	1.62	4.74	5.42	4.6
SIMKK	Cluster-6422.90412	191.71	184.91	96.03	56.33	67.77	39.27	69.45	49.66	41.56
EBF1/2	Cluster-6422.135743	17.64	12.76	14.28	10.03	9.11	7.53	7.42	5.04	5.77
	Cluster-6422.55554	3.51	4.52	18.32	4.62	2.58	5.92	11.88	11.49	9.6
	Cluster-6422.77210	4.72	6.86	23.37	6.27	3.87	7.32	14.9	12.96	12.39
	Cluster-6422.92934	22.52	23.99	24.06	21.65	22.81	13.18	13.28	10.68	9.16
BSK	Cluster-6422.100408	3.01	4.37	5.67	0.87	0.83	3.99	1.34	0.76	1.03
	Cluster-6422.101291	4.39	2.4	5.81	5.88	8.04	2.62	0.97	1.01	1.01
	Cluster-6422.83492	74.81	83.69	97.07	50.44	56.27	50.42	42.93	37.23	32.44
BZR1/2	Cluster-6422.134532	7.55	5.71	4.49	14.4	9.97	6.84	1.55	4.31	3.12
	Cluster-6422.45799	22.34	30.58	16.53	68.75	51.98	47.58	20.95	15.52	16.91
	Cluster-6422.76329	2.53	4.23	1.08	5.89	7.31	10.04	0.85	2.66	1.94
	Cluster-6422.82008	14.97	14.57	16.06	72.45	75.54	59.24	22.03	37.15	22.16
	Cluster-6422.92537	96.53	106.63	129.21	202.64	257.25	234.4	130.29	237.43	187.37
	Cluster-6422.96499	44.73	49.27	70.74	119.93	155.16	134.96	78.66	146.07	107.65
TCH4	Cluster-6422.108478	14.23	15.68	102.49	64.69	86.67	232.04	54.78	691.16	270.45
	Cluster-6422.29984	0.56	0.96	7.75	6.04	9.46	54.41	13.76	66.9	26.8
	Cluster-6422.64515	0.1	0.16	2.28	5.23	6.02	54.25	7.63	37.67	26.09
	Cluster-6422.82674	0.4	0.39	3.01	7.18	12.46	30.59	9.89	53.82	34.13
	Cluster-6422.87099	1.15	1.12	6.1	2.8	5.27	9.33	3.1	43.89	16.87
CYCD3	Cluster-6422.118204	23.09	20.78	22.79	0.15	0.36	15.6	0.49	0.59	0.56
JAR1	Cluster-6422.142479	6.2	5.79	15.7	1.48	1.46	1.24	3.46	1.44	1.27
COI1	Cluster-6422.105063	1.9	0.37	11.9	0.88	1.43	2.56	1.04	0.7	0.38
	Cluster-6422.94399	3.11	2.63	3.44	0.81	1.29	0.7	0.81	0.87	0.45
JAZ	Cluster-6422.103173	10.53	11.13	7.27	38.45	35.38	37.74	24.24	38.64	33.92
	Cluster-6422.103785	15.67	16.86	17.17	59.3	43.81	75.34	33.69	73.59	84.21
	Cluster-6422.107121	1.98	2.21	2.92	1.88	7.11	2.6	2.88	7.48	5.22
	Cluster-6422.107300	6.49	6.42	4.56	18.86	12.06	22.7	9.6	20.51	25.07
	Cluster-6422.109211	6.49	13.62	6.16	108.68	135.98	108.82	27.21	102.52	75.69
	Cluster-6422.111984	0.06	0.75	0.16	58.59	96.09	3.27	0.59	12.58	5.3
	Cluster-6422.115912	0.4	0.13	2.45	4.77	4.09	53.59	6.19	10.51	11.95
	Cluster-6422.125300	2.39	1.45	1.73	11.07	15	8.4	2.42	1.88	0.97
	Cluster-6422.43844	1.9	1.52	0.96	7.42	5.29	63.82	5.76	11.2	14.23
	Cluster-6422.48560	3.3	2.63	2.03	4.61	2	17.37	7.19	8.6	7.25
	Cluster-6422.60934	0.89	28.68	28.5	198.22	273.99	283.68	46.58	270.69	173.66
	Cluster-6422.60935	1	1.87	1.61	32.13	35.27	25.06	8.12	32.48	26.97
	Cluster-6422.70005	4.14	4.43	2.55	12.49	19.08	4.48	7.73	11.14	13.07
	Cluster-6422.73530	2.4	18.37	30.35	190.86	285.01	252.24	43.54	241.99	149.22
	Cluster-6422.75051	0.66	0.91	3.58	82.36	128.85	43.81	15.8	99.03	58.95
	Cluster-6422.86657	64.84	57.81	26.95	94.61	91.69	112.38	120.96	145.47	178.69
	Cluster-6422.89865	19.42	21.14	14.25	63.9	64.06	78.77	52.97	81.6	77.55
	Cluster-6422.89866	0.46	0.44	0.87	6.5	6.85	3.7	3.96	2.78	3.03
	Cluster-6422.95019	1.35	1.46	2.56	16.77	13.48	12.29	5.56	14.12	12.81
MYC2	Cluster-6422.100331	10.06	11.38	2.97	32.18	18.06	52.19	26.28	31.51	35.3
	Cluster-6422.100741	3.46	3.51	3.42	2.28	2.01	1.97	1.25	0.74	1.11
	Cluster-6422.102645	20.33	29.88	32.65	68.31	65.8	51.22	28.22	52.22	40.54
	Cluster-6422.103516	2.86	1.97	1.75	21.63	20.27	5	2.13	5.56	3.52
	Cluster-6422.110959	2.67	3.6	3.6	17.96	20.11	8.49	3.74	6.15	5.56
	Cluster-6422.26398	1.57	1.62	1.69	2.82	2.64	1.91	4.52	3.33	3.35
	Cluster-6422.51018	0.06	0.06	0.05	1.51	1.12	0.65	3.25	4.73	4.38
	Cluster-6422.82607	11.68	9.69	6.81	5.95	4.18	0.99	5.08	5.19	3.47
	Cluster-6422.88067	3	4.77	3.28	10.04	8.39	12.28	3.95	11.62	8.78
	Cluster-6422.88070	11.4	18.97	13.63	58.1	46.39	38.51	25.08	51.35	43.04
	Cluster-6422.91901	10.52	11.2	3.2	29.45	20.6	38.67	24.75	25.37	23.78
	Cluster-6422.92401	11.9	15.53	12.38	35.95	27.21	21.42	18.1	17.86	19.35
	Cluster-6422.95711	7.74	11.12	7.74	19.64	24.43	14.12	7.42	14.22	10.24
	Cluster-6422.96073	9.08	10.72	28.54	40.49	39.49	45.05	38.8	40.85	45.08
	Cluster-6422.97207	40.42	39.48	42.81	28.45	24.63	27.28	19.06	14.9	13.93
	Cluster-6422.98893	0.69	1.29	1.55	9.86	10.28	13.5	2.61	11.57	6.67
NPR1	Cluster-6422.108216	7.09	4.53	4.42	4.32	4.74	5.32	1.38	0.62	0.45
	Cluster-6422.62910	10.96	9.3	7	7.75	9.23	6.65	3.54	3.28	3.01
PR1	Cluster-6422.31781	41.88	42.4	42.22	6.98	7.48	1.84	5.84	3.39	2.39

## Sheet: Table S8
Table S8 Differentially expressed transcription factors during the male and female cones development
Male flower				Female flower
Top	TFs	Number		Top	TFs	Number
1	bHLH	129		1	AP2/ERF	113
2	AP2/ERF	115		2	bHLH	83
3	MYB-related	114		3	MYB	69
4	MYB	107		4	NAC	63
5	SET	88		5	mTERF	60
6	mTERF	83		6	WRKY	58
7	C3H	81		7	MYB-related	51
8	C2H2	79		8	Tify	50
9	SNF2	68		9	MADS-M-type	45
10	Tify	65		10	C2H2	38
11	NAC	63		11	LOB	36
12	PHD	63		12	C3H	34
13	LOB	60		13	SET	29
14	MADS-M-type	46		14	HB-HD-ZIP	25
15	WRKY	44		15	bZIP	23

## Sheet: Table S9
Table S9 Specific primers used for qRT-PCR
Source	Gene name	Primer sequences (5' to 3')
		Forward Primer (F)	Reverse Primer (R)
Male cone	Cluster_3272_95695	CCCATTGCATTTCCAAGTTCTAC	TCACATAACCGGATGACACTG
	Cluster_3272_90666	CCGTGTCTGTGTTTGTGTTG	CAACAGGGTCCTTGCTAAATTG
	Cluster_3272_97571	ATTTGGGACAGGTGAAGAGAC	GGCGTAGGATTTATGGAGAGG
	Cluster_3272_82564	TGGATTGGCTGGATGGTTG	TGTCTTCGTCATTGTCTTCCC
Female cone	Cluster_6422_114584	ACTACAACTACAAAGCTGCGG	TCATCCAGAACCAAACCGC
	Cluster_6422_77575	AGACACAATAACCTCGCTGG	TTCTCTTCAATACCCCTTCAGC
	Cluster_6422_101870	CATCACAGTTTTATTCGCCATCTC	GAGCCCTGGAATTTTCATCTTG
	Cluster_6422_26247	TGAAAAGAGGGTTGAGATGGG	CAGCCAGTTGTGACCTAACA
Reference gene	18S	GAGGTAGCTTCGGGCGCAACT	GCAGGTTAGCGAAATGCGATAC
